# Supplementary material
Source: publisher site journal article supplement (https://www.dovepress.com/get_supplementary_file.php?f=309768.docx)
Supplement: Supplementary file 1 [file get_supplementary_file.php]

**Appendix 1**

**Study Protocol: Long-acting injectable antipsychotics: A systematic review of their non-systemic adverse effect profile**

| Rationale & Study Objective | Previous evidence has dedicated limited attention to non-systemic side effects associated with LAI antipsychotics, which are rarely reported in clinical trials. This study will aim to systematically review all the available evidence reporting injection-site adverse effects associated with the administration of LAI antipsychotics. The review of injection site adverse events of single LAI antipsychotics will provide evidence-based recommendations for their safe use in practice and may help clinicians in tailoring their choice of treatment. |
| --- | --- |
| Methods | - Electronic database search using the following: - PubMed - SCOPUS - Embase - Cochrane databases - Time period: from database inception till the time of study conduction - Search terms will include: “LAIAPs”, “long acting depot”, “antipsychotics”, “neuroleptics”, “local reactions” and “injection site adverse effects” - All articles in English will be included in the literature search - Selection of articles will be done through the following stages:   - Remove duplicates using EndNoteTM   - Screen records through titles and abstracts   - Assess full articles for eligibility - The following exclusion criteria may be followed as a guide:   - Adverse effects reported not related to injection site reactions   - Adverse effects reported in product monographs |
| Results | Report findings of selected articles, summarizing key findings, long acting injectable antipsychotic agents investigated and method in which injection site reactions were measured and reported. |
| Quality of studies | Quality of studies will be assessed using the CASP tool and relative limitations will be reported. |
| Analysis of findings | Findings reported in the Results section will be discussed and analyzed, from which key recommendations will be derived. |
